# Supplementary material for: Vaccination decreases the risk of influenza A virus reassortment but not genetic variation in pigs
Source: eLife journal article supplement (doi:10.7554/elife.78618), 2022-08-11

# PB2

- H1N1 origin
- H3N2 origin
- Mixed origin
- Original challenge strain
- Reference strain

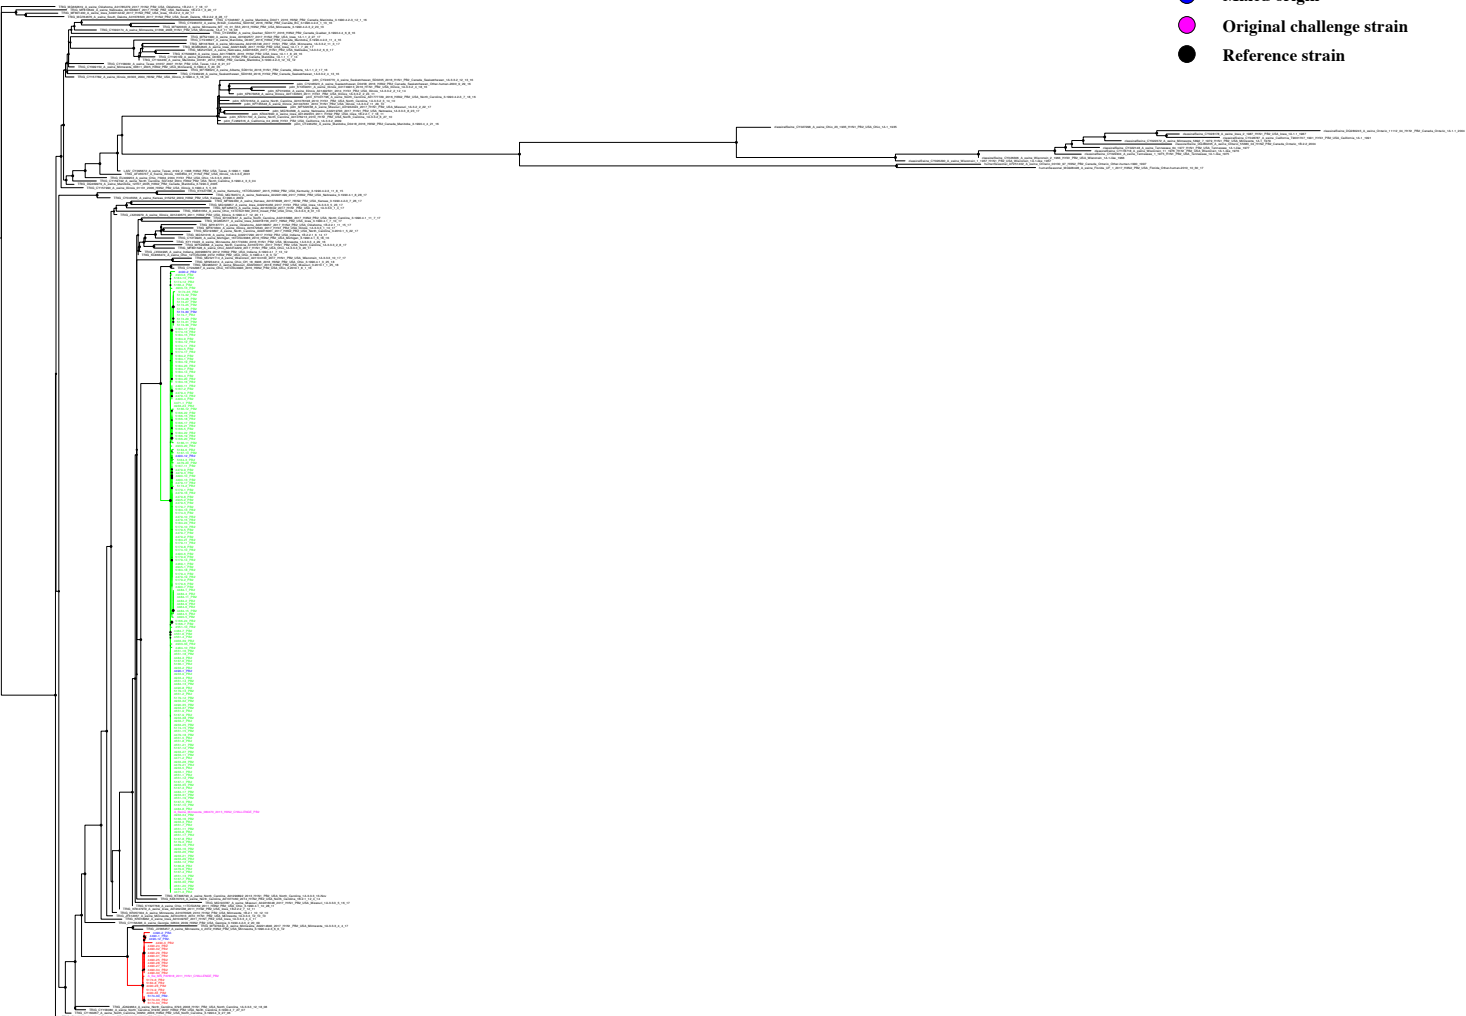

Key

- H1N1 origin
- H3N2 origin
- Mixed origin
- Original challenge strain
- Reference strain

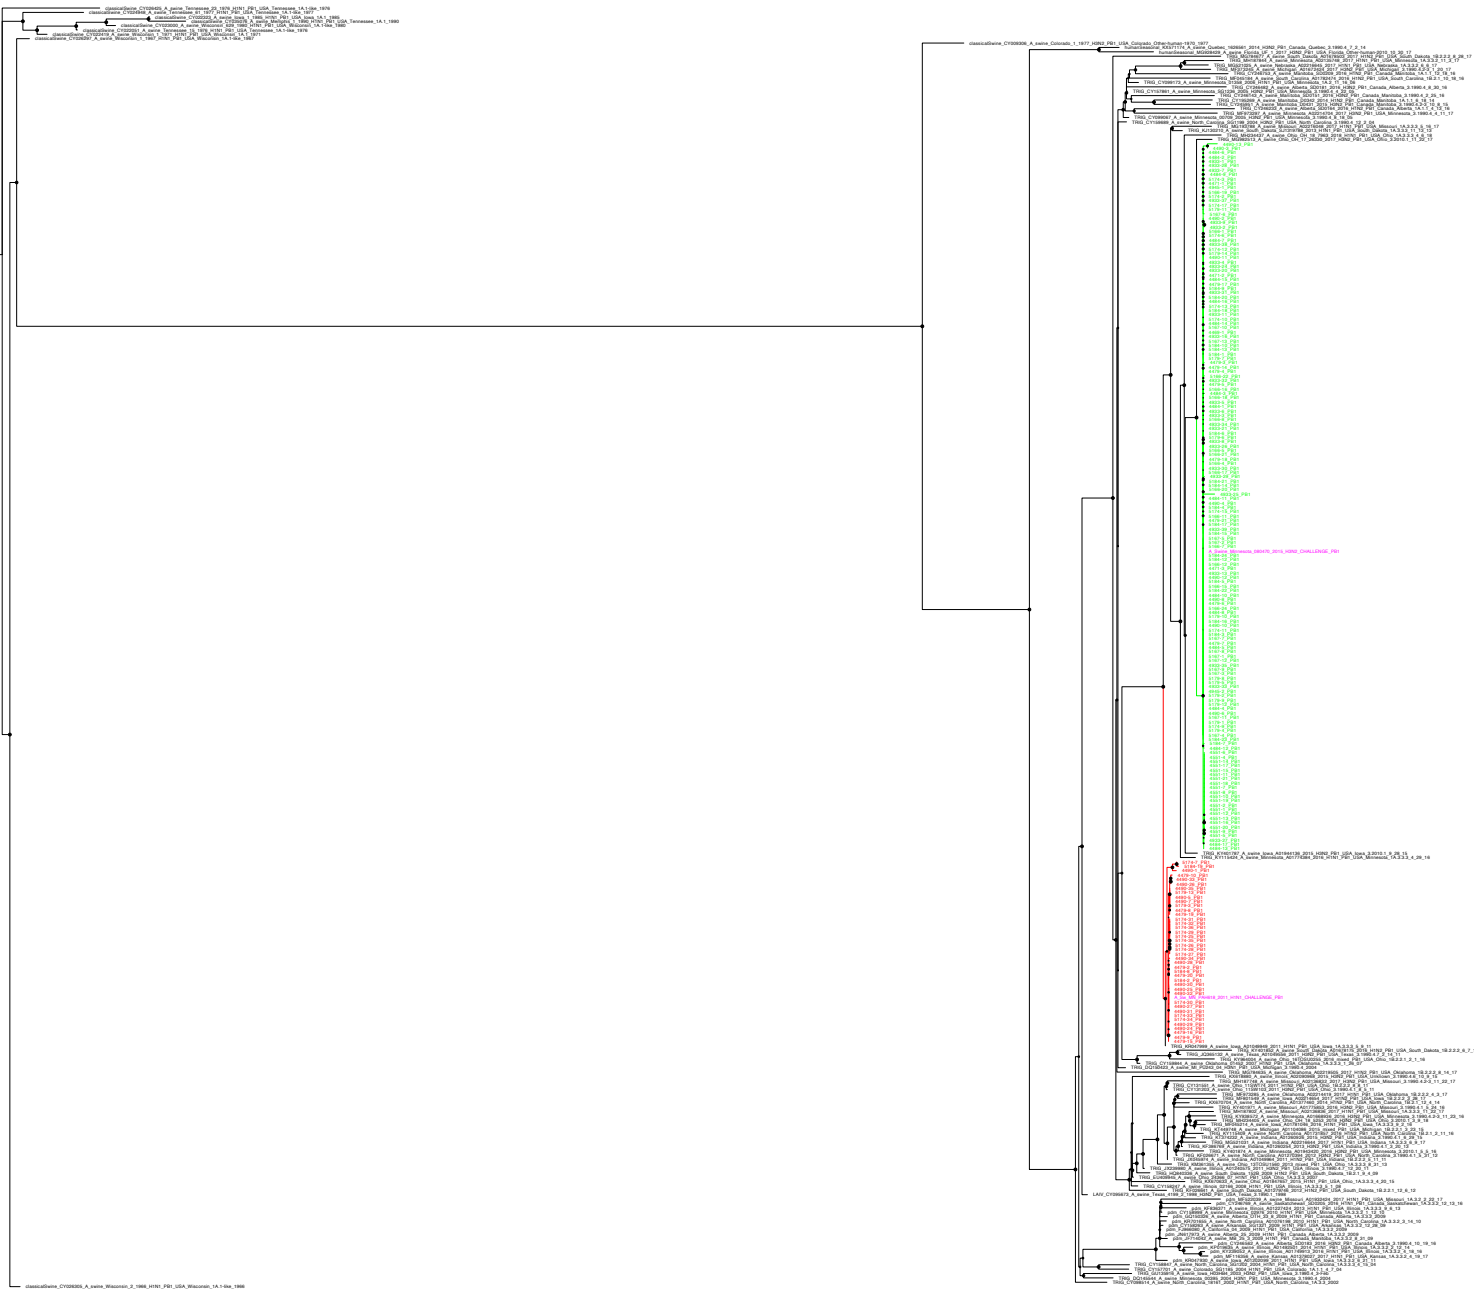

- H1N1 origin
- H3N2 origin
- Mixed origin
- Original challenge strain
- Reference strain

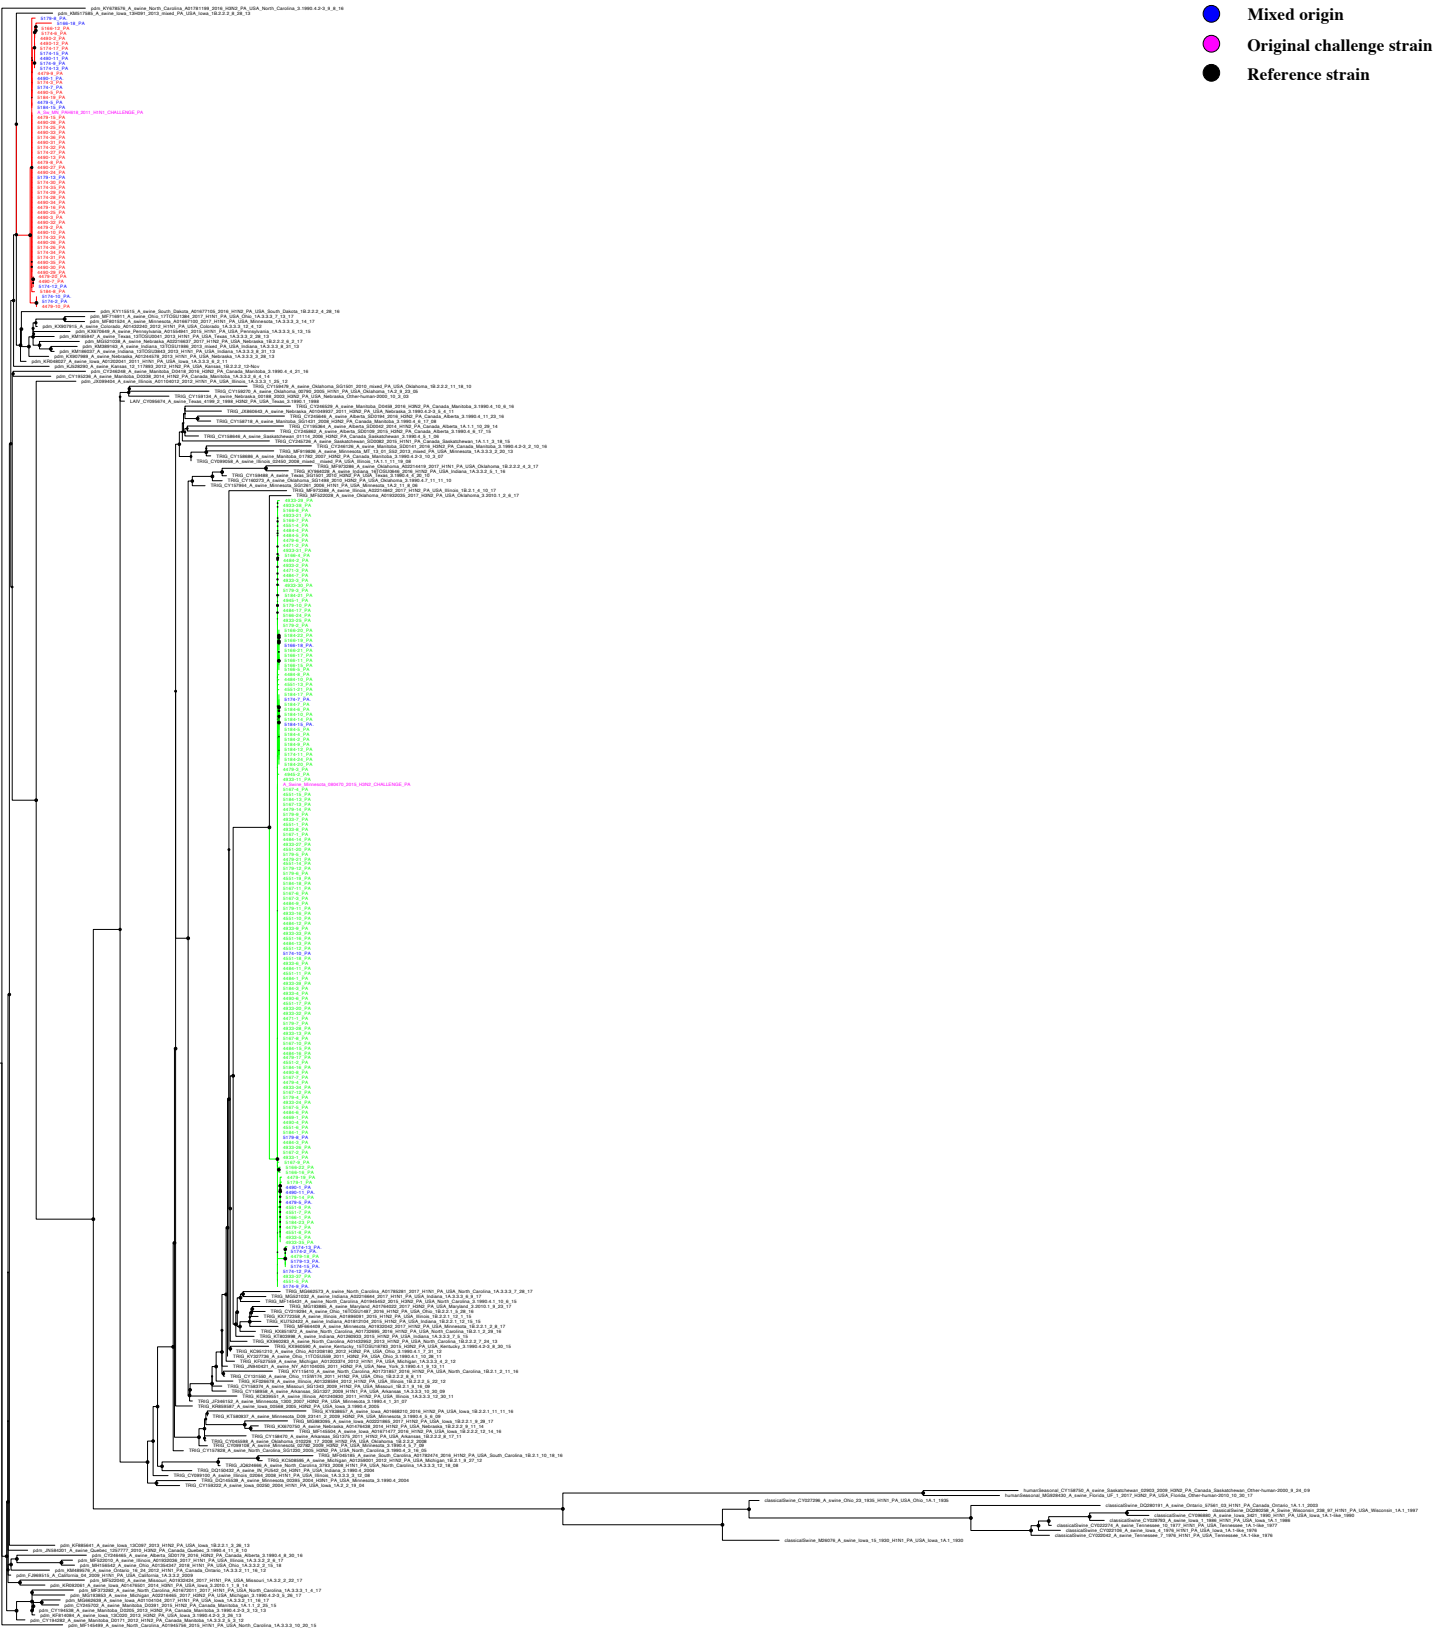

Key

- H1N1 origin
- H3N2 origin
- Mixed origin
- Original challenge strain
- Reference strain

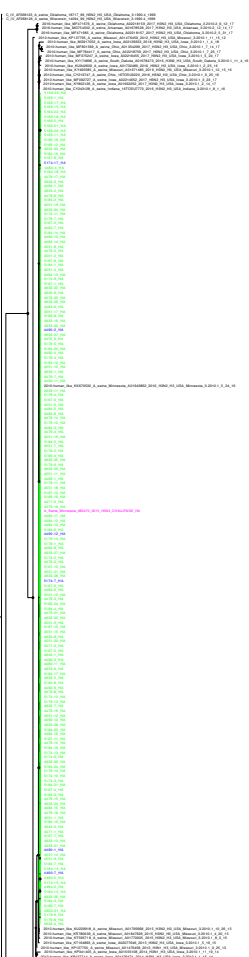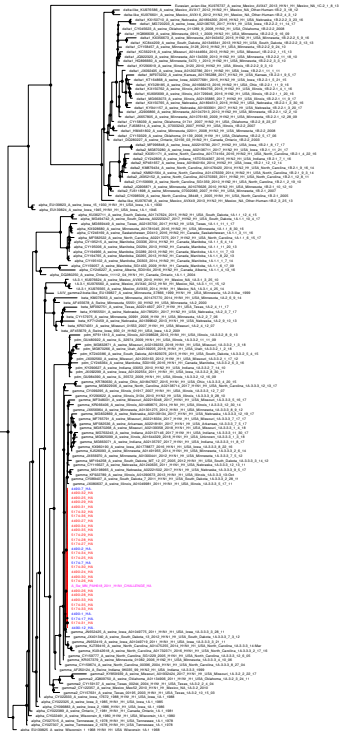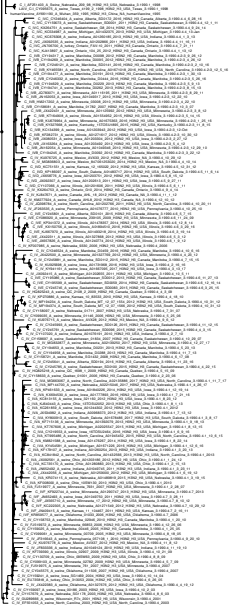

Key

- H1N1 origin
- H3N2 origin
- Mixed origin
- Original challenge strain
- Reference strain

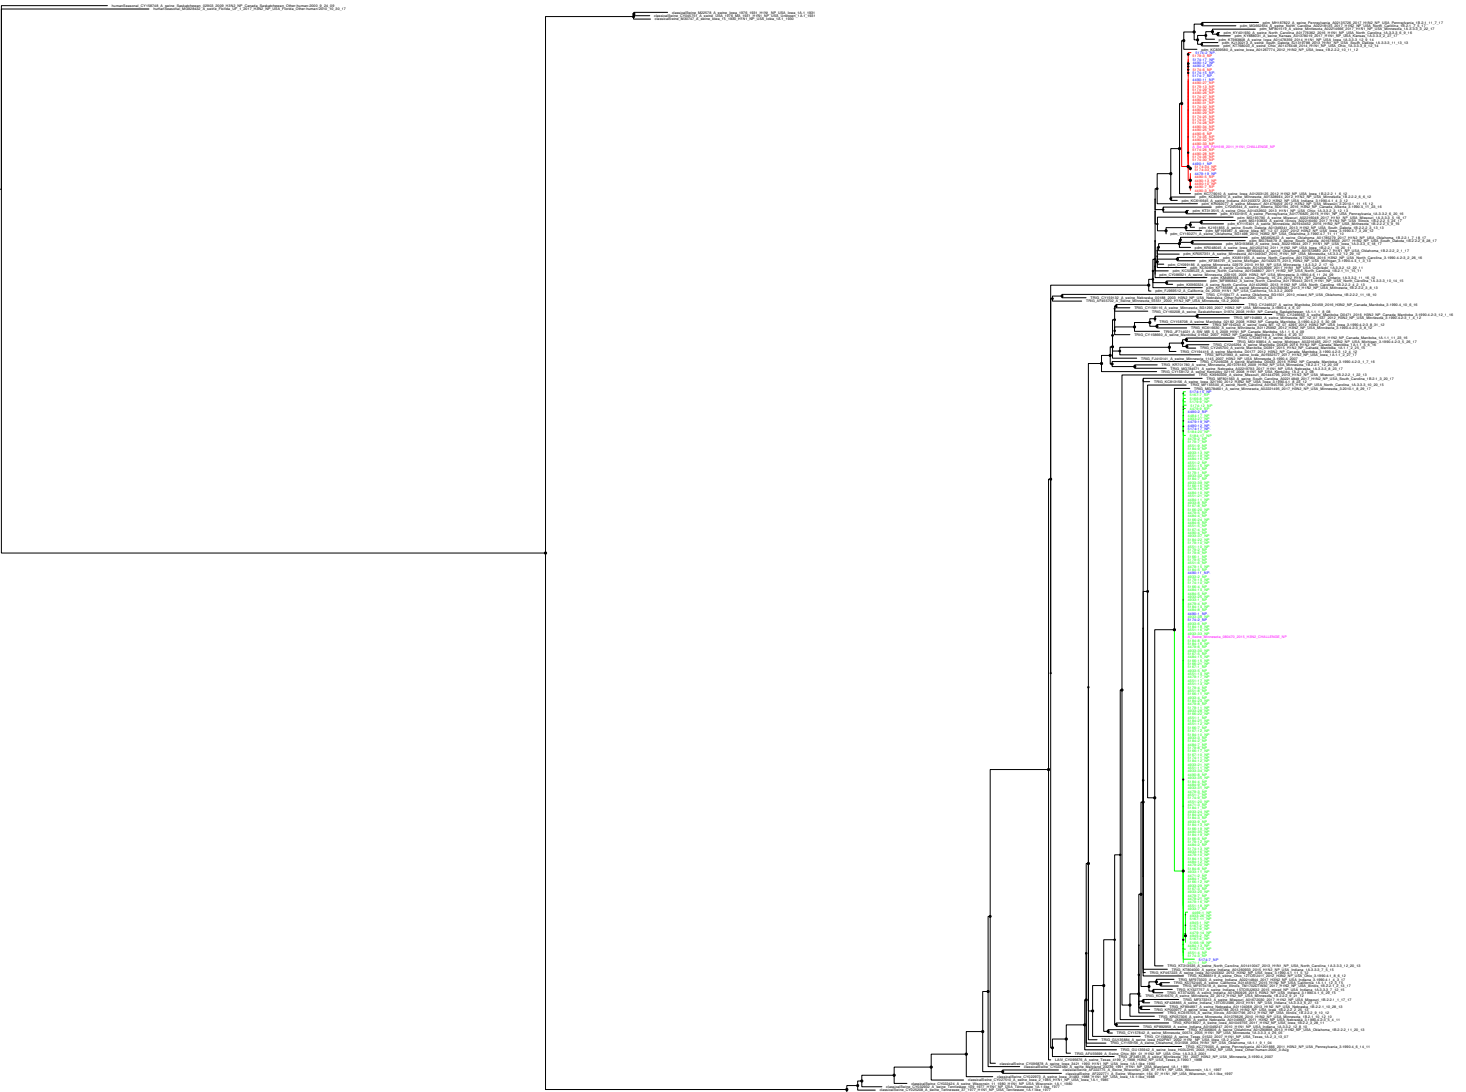

- Key**
- H1N1 origin
  - H3N2 origin
  - Mixed origin
  - Original challenge strain
  - Reference strain

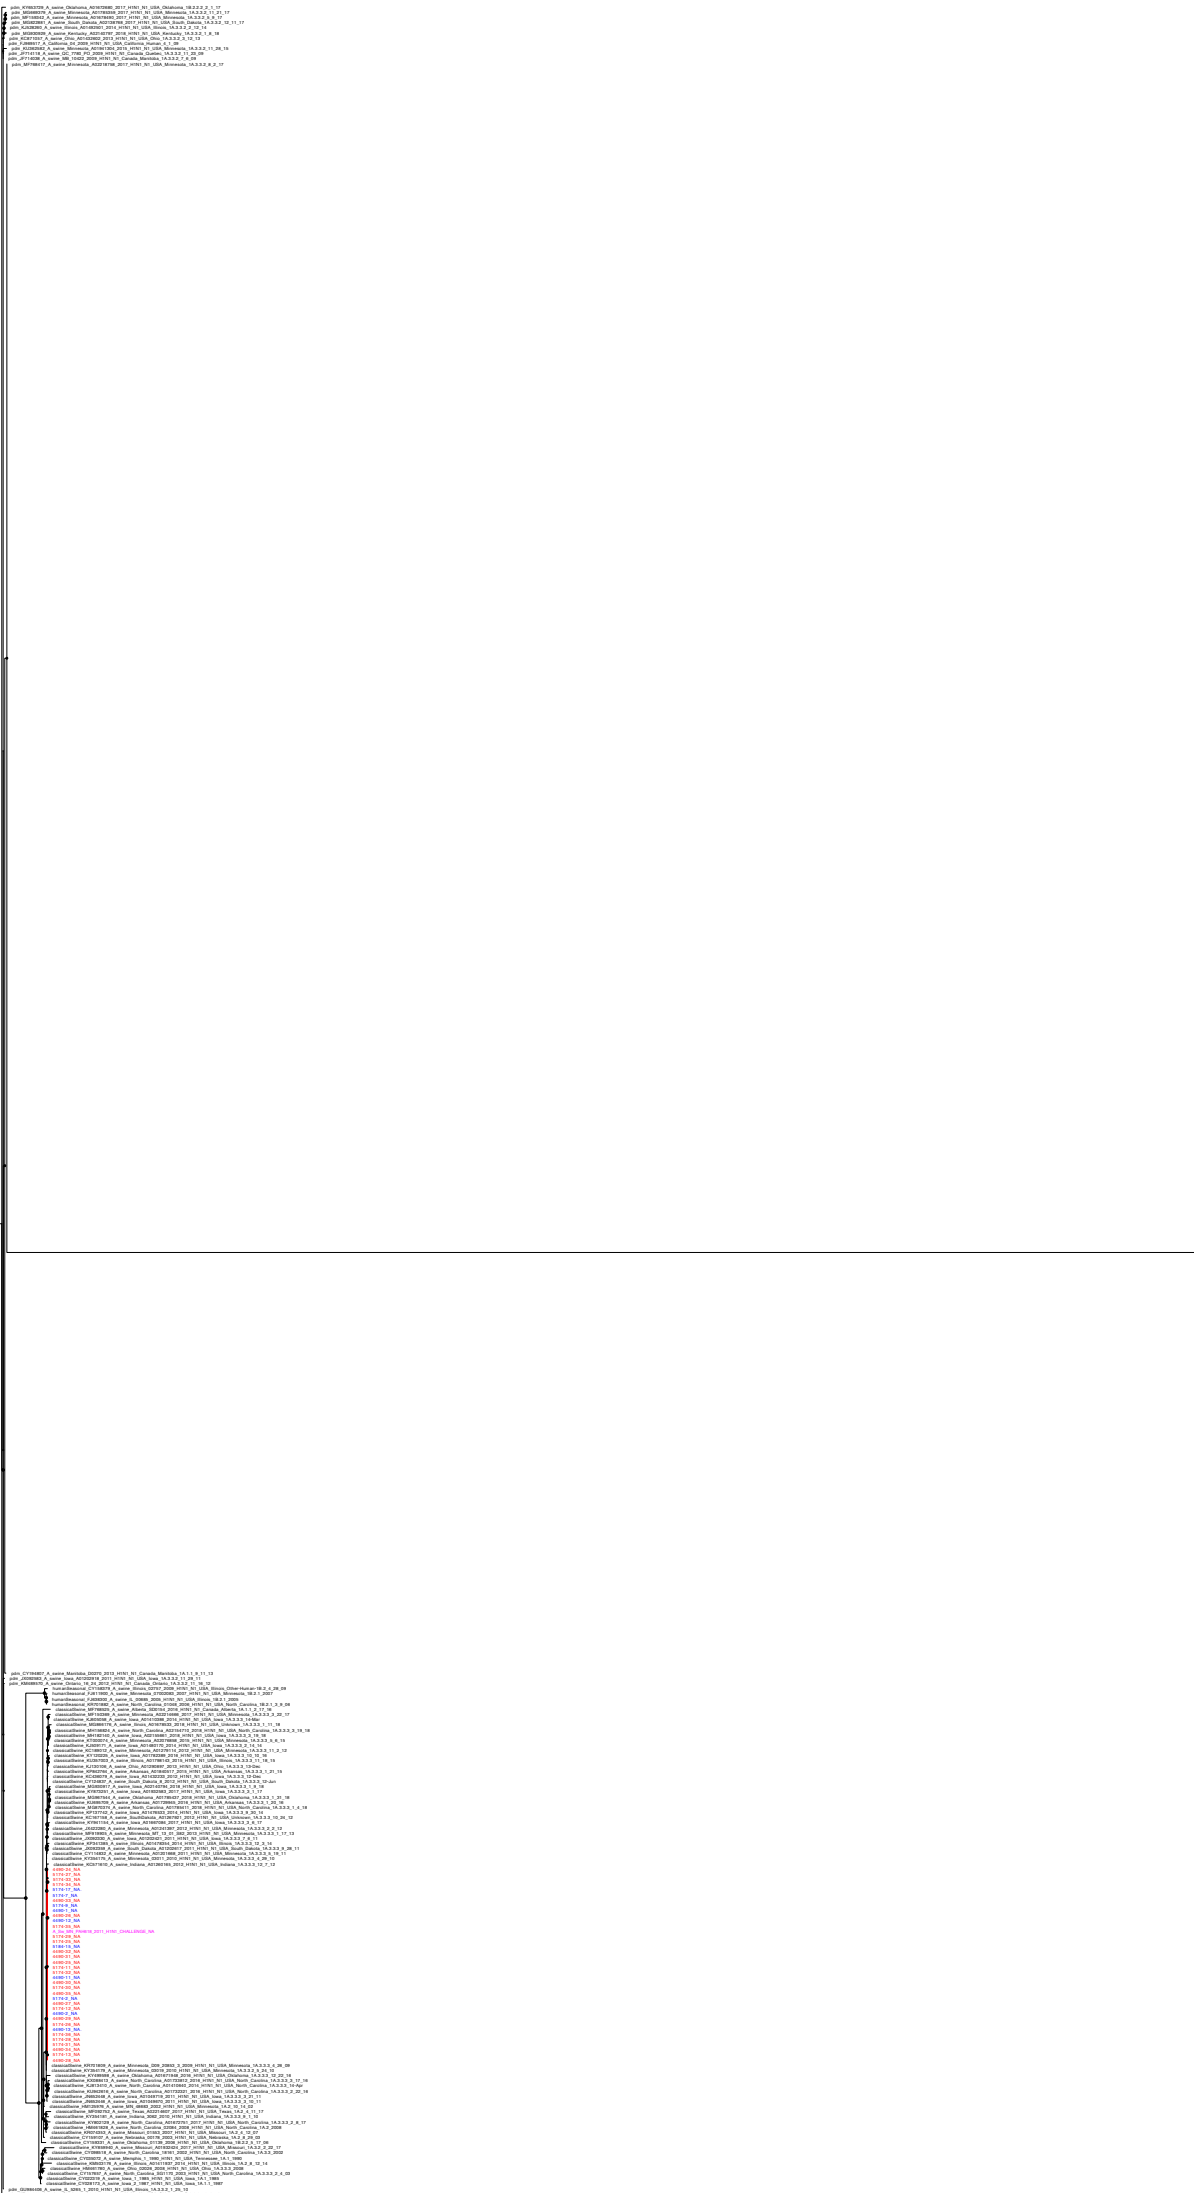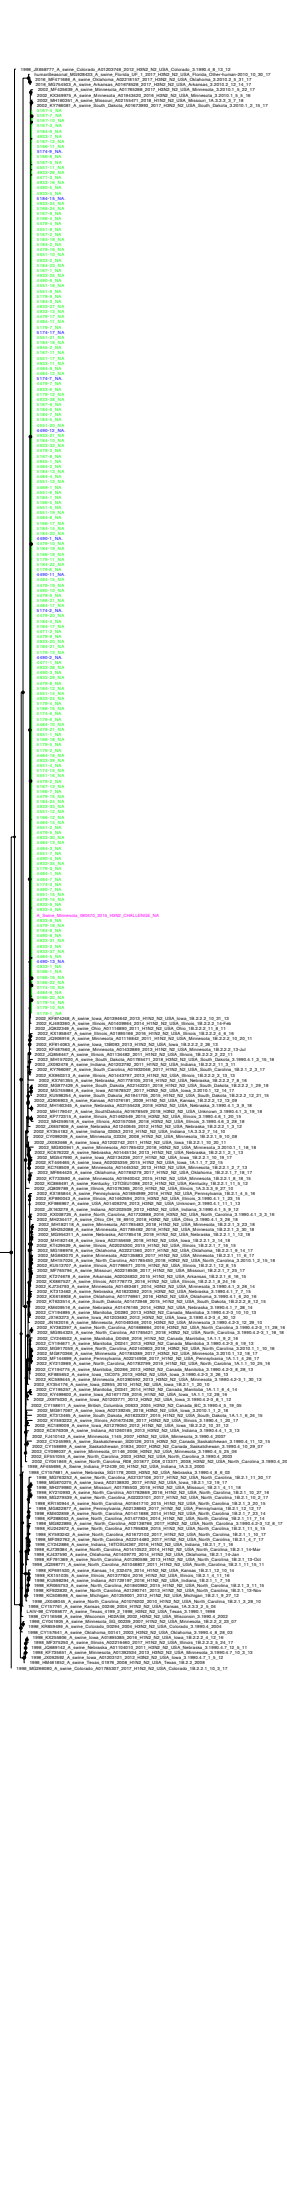

M

Key

- H1N1 origin
- H3N2 origin
- Mixed origin
- Original challenge strain
- Reference strain

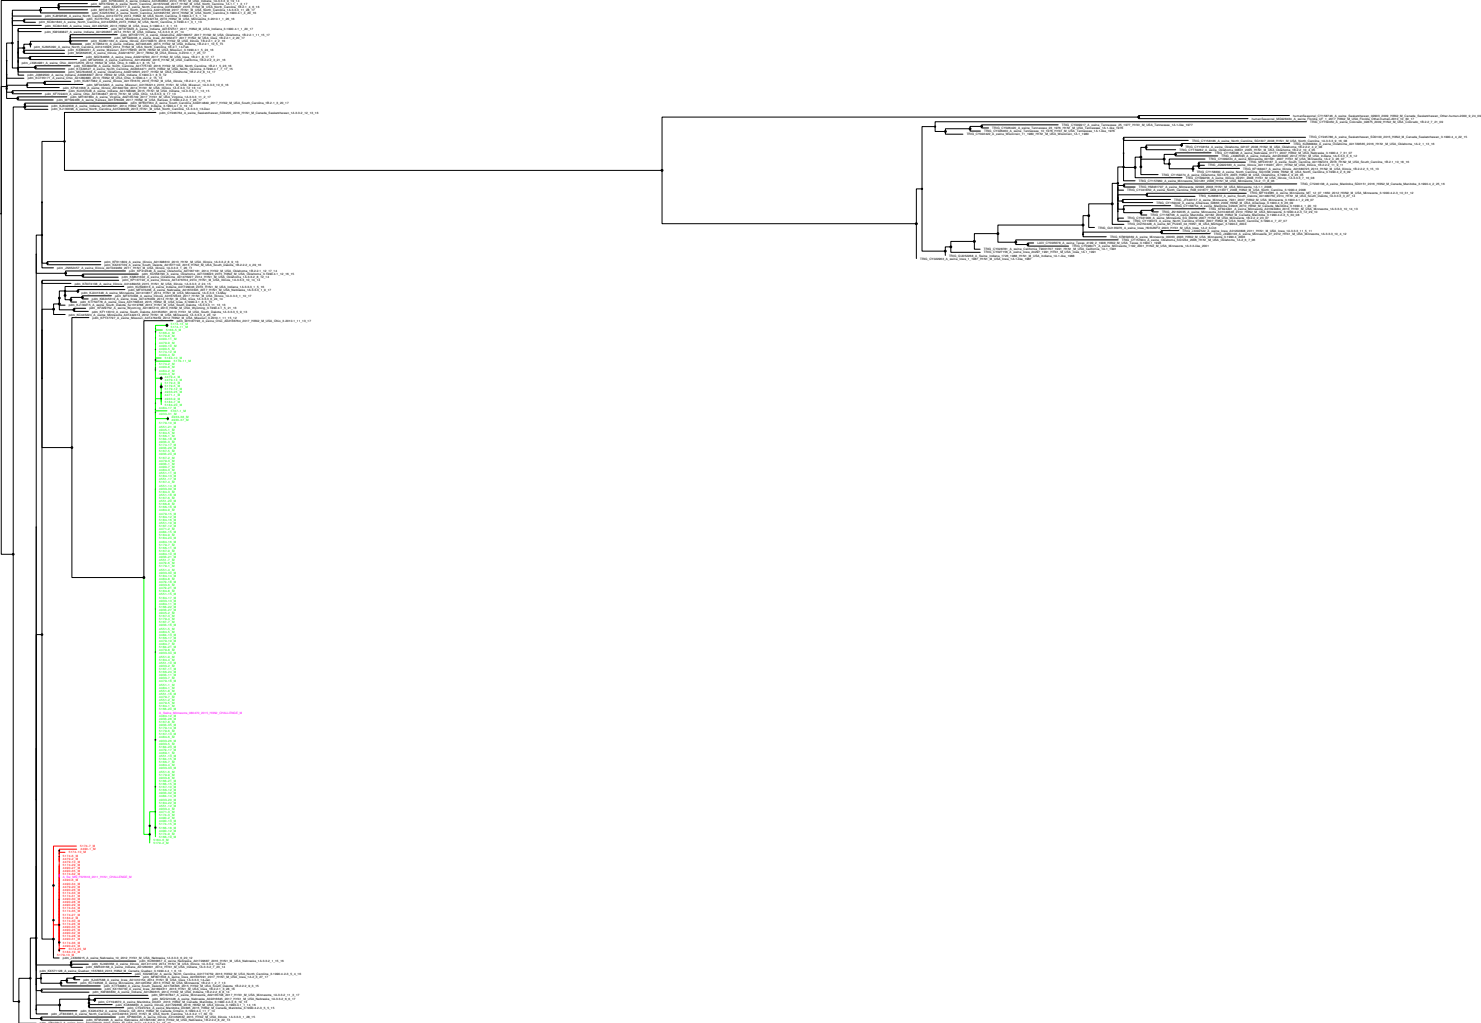

- H1N1 origin
- H3N2 origin
- Mixed origin
- Original challenge strain
- Reference strain

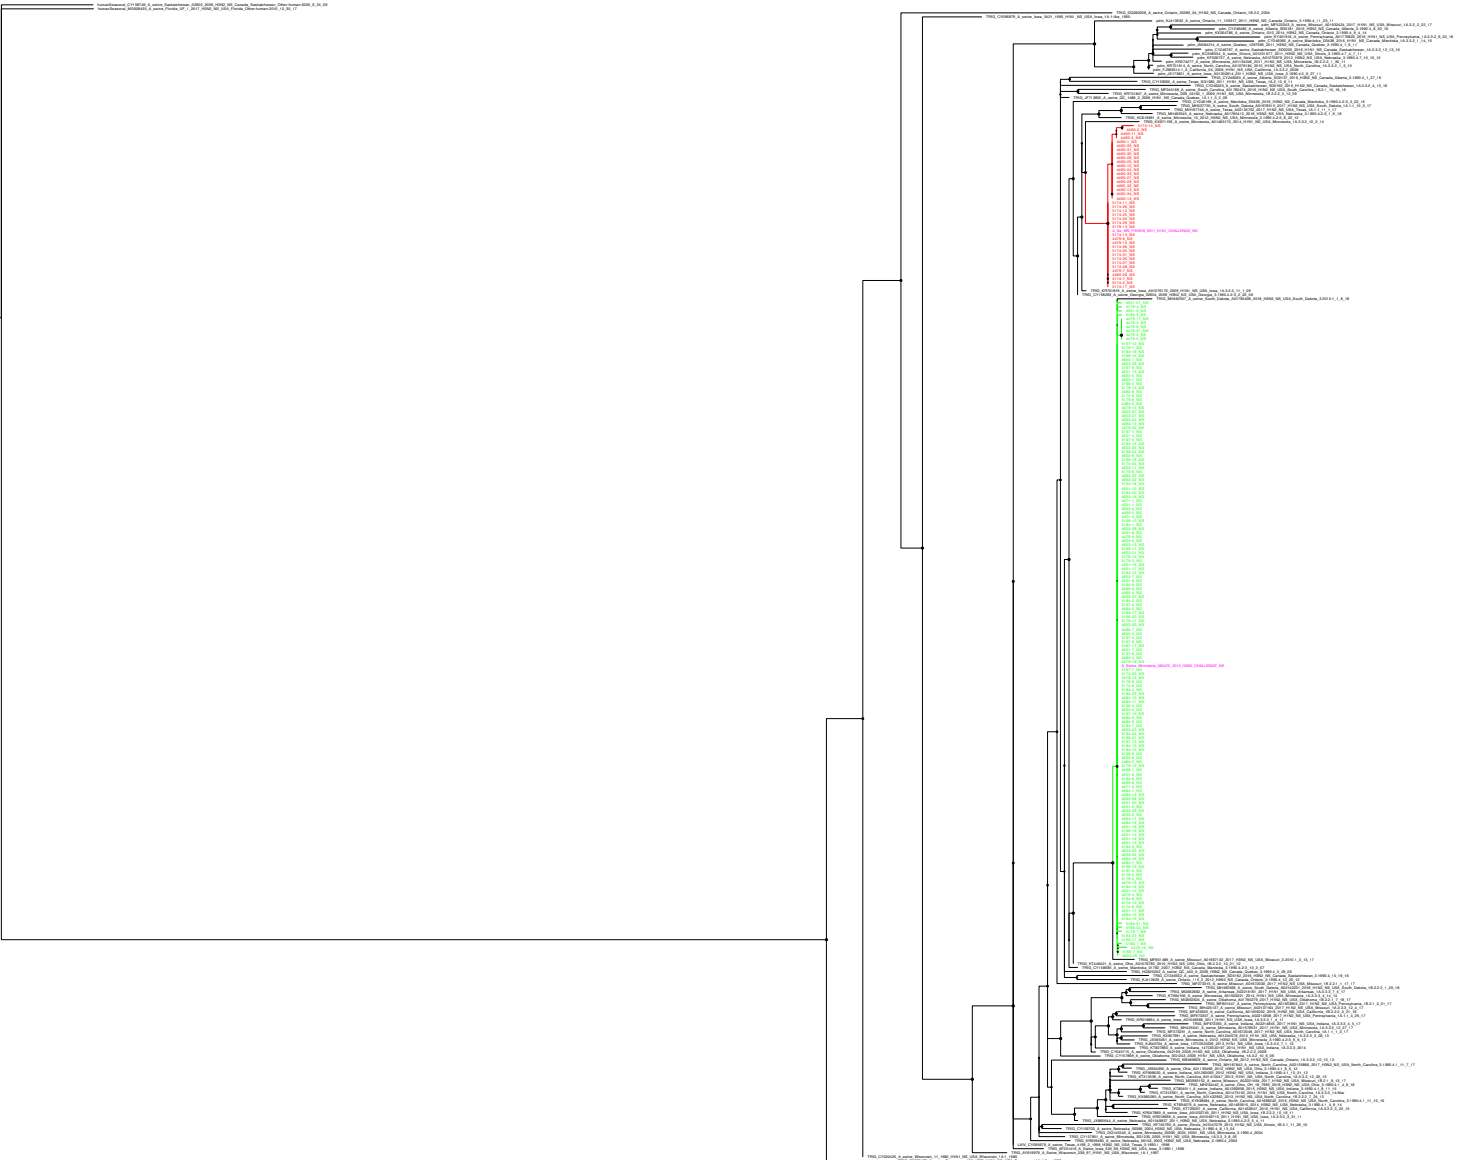

Supplement: fig2-data1 [file elife-78618-fig2-data1-v1.pdf]
